# Supplementary material
Source: publisher site journal article supplement (https://www.dovepress.com/article/380994)
Supplement: Supplementary file 1 [file get_supplementary_file.php]

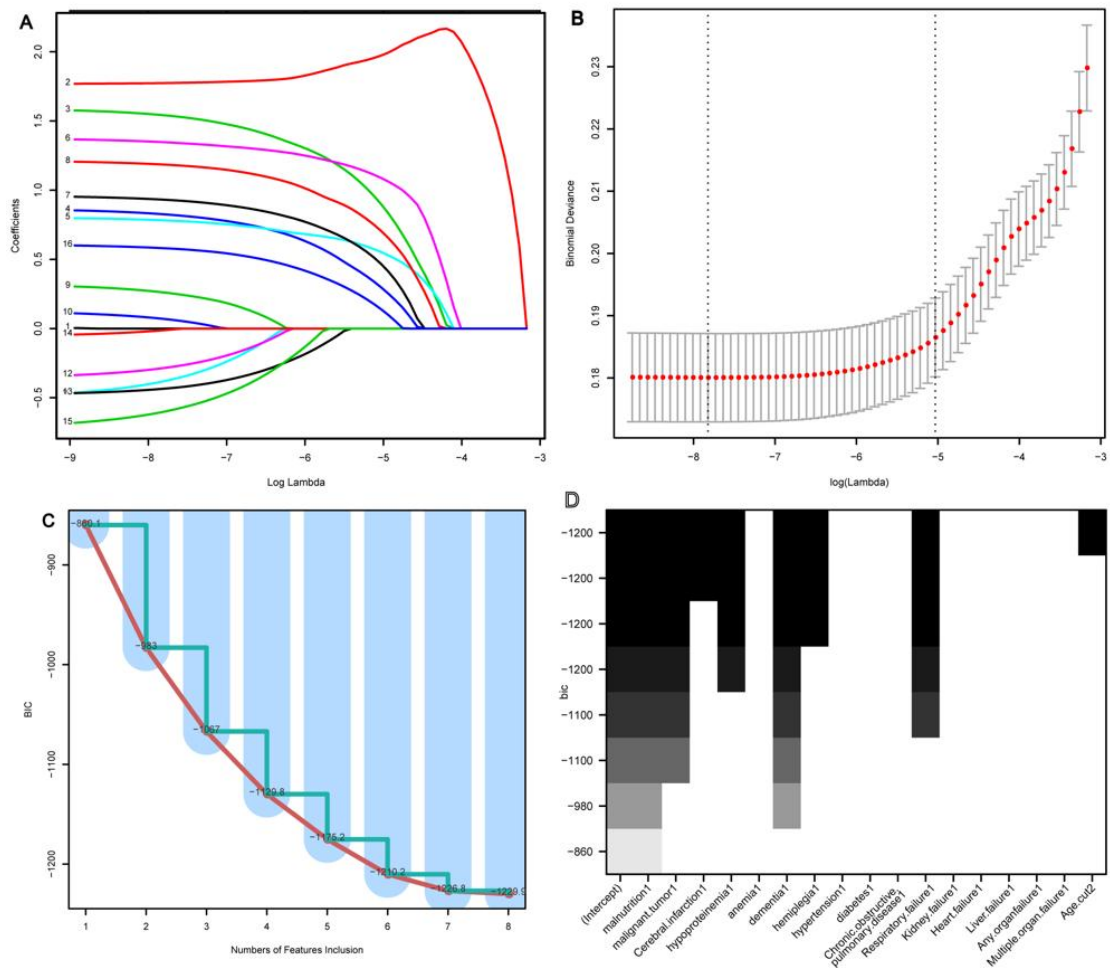

Supplementary Figure 1 Screening of predictors for nomogram prediction model. (A, B) is variable selection based on LASSO regression, and (C, D) is variable selection based on optimal subset regression.

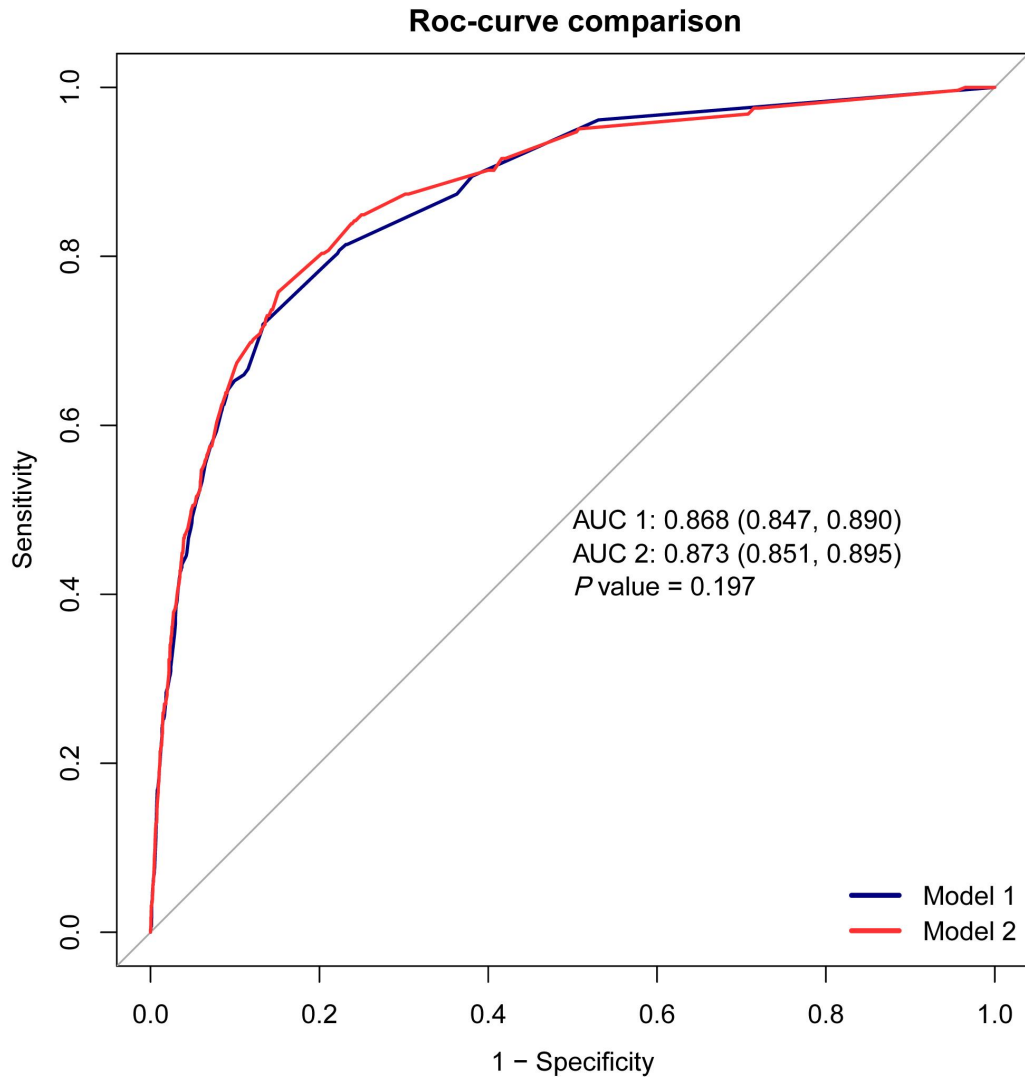

Supplementary Figure 2 Compare the discrimination ability of the two Nomogram models with predict CAPI. The blue curve represents the discrimination ability of the model with 8-variables, and the red curve represents the discrimination ability of the model with 10-variables.
